# Supplementary material for: Evaluation of six novel antigens as potential biomarkers for the early immunodiagnosis of schistosomiasis
Source: PubMed Central journal article supplement (PMC4558877; doi:10.1186/s13071-015-1048-2), 2015-09-04
Supplement: 13071_2015_1048_MOESM1_ESM.pdf [file 13071_2015_1048_MOESM1_ESM.pdf]

### Additional file 1: Primers used for gene cloning

| Primer           | Primer sequence (5'-3')                                    |
|------------------|------------------------------------------------------------|
| SjSP-13 Forward  | CG GGATCC CTTGAAAATTCTGTGTCAC                              |
| SjSP-13 Reverse  | CG CTCGAG CTATTA GTGATGGTGATGGTGATG AATAGTGAATTGAACTAGAAAC |
| SjSP-23 Forward  | CG GGATCC GCCAAACAATTATCCAACG                              |
| SjSP-23 Reverse  | CG CTCGAG CTATTA GTGATGGTGATGGTGATG TCATTTATCTTTCAGGCAGTAA |
| SjSP-160 Forward | CG GGATCC ATGAACTATTTTGTACTAAC                             |
| SjSP-160 Reverse | CG CTCGAG CTATTA GTGATGGTGATGGTGATG TTATGCAAAAGGATATTC     |
| SjSP-164 Forward | CG GGATCC ATGTTTCTAAGTGTATTTTTATC                          |
| SjSP-164 Reverse | CG CTCGAG CTATTA GTGATGGTGATGGTGATG TTATACCAATGTTATAACTG   |
| SjSP-189 Forward | CG GGATCC ATGTTTCTAAGTGTATTTCT                             |
| SjSP-189 Reverse | CG CTCGAG CTATTA GTGATGGTGATGGTGATG TTATACCAATGTTATAATAC   |
| SjSP-216 Forward | CG GGATCC ATGTTGAAAATCGCAGTTTG                             |
| SjSP-216 Reverse | CG CTCGAG CTATTA GTGATGGTGATGGTGATG TTAGGTATTTATAAGTCCAGC  |
