# Supplementary material for: Evaluation of six novel antigens as potential biomarkers for the early immunodiagnosis of schistosomiasis
Source: PubMed Central journal article supplement (PMC4558877; doi:10.1186/s13071-015-1048-2), 2015-09-04

**Additional file 2: SDS-PAGE analysis of purified recombinant proteins.** Proteins were expressed in *E. coli* and purified using the Ni-NTA agarose affinity system under **denaturing** conditions. The purified antigens were re-natured in refolding buffer C7 before SDS-PAGE analysis.

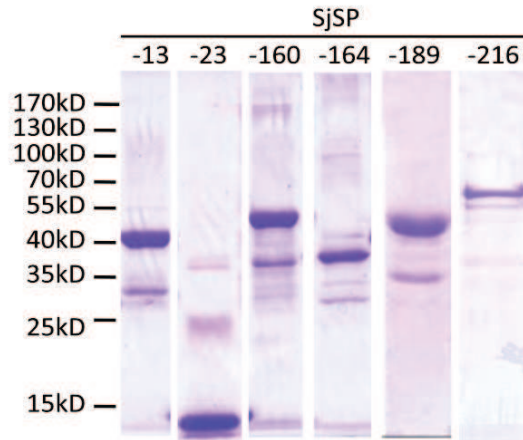

Supplement: 13071_2015_1048_MOESM2_ESM.pdf [file 13071_2015_1048_MOESM2_ESM.pdf]
