# Supplementary material for: Evaluation of six novel antigens as potential biomarkers for the early immunodiagnosis of schistosomiasis
Source: PubMed Central journal article supplement (PMC4558877; doi:10.1186/s13071-015-1048-2), 2015-09-04

**Additional file 3: Expression profile of superoxide dismutase (SOD) gene at different developmental stages of *S. japonicum*.** Real-time PCR was performed to detect the transcripts of SOD at life stages of cercaria, young worm (Young), adult worm (Adult) and egg. Data were analyzed according to  $2^{-\Delta\Delta Ct}$  method using GAPDH as the internal control for each sample. The fold changes of gene transcriptional level in young worm, adult worm and egg were calculated as compared with cercaria.

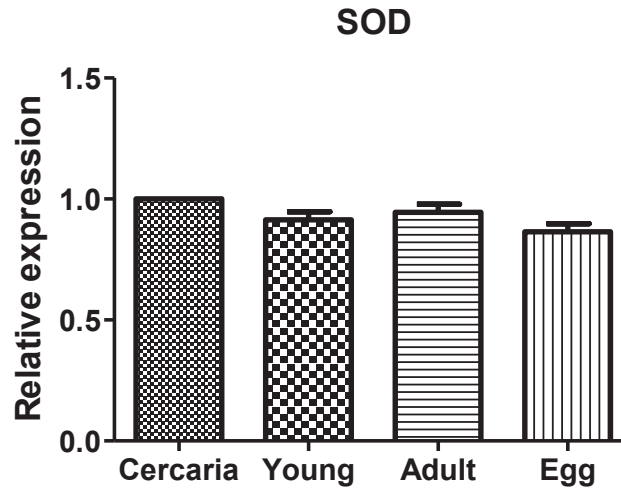

Supplement: 13071_2015_1048_MOESM3_ESM.pdf [file 13071_2015_1048_MOESM3_ESM.pdf]
